# Supplementary material for: Volatile resorption expedites eruption onset in large silicic systems
Source: Research Square preprint supplement (doi:10.21203/rs.3.rs-6839171/v1), 2025-07-11
Supplement: Supplementary file 1 [file f164550f6854b70c5ff682b1.docx]

**Supplementary information 1: Calculate variations in gas volume fractions using the conservation of water mass equation**

To test the impact of recharge-induced magma chamber **pressurization** (*Hypothesis 1*), **magma** **mixing** (*Hypothesis 2*), and **variations in phase proportions** (*Hypothesis 3*) on volatile resorption, we model the corresponding changes in gas volume fractions ( solving the equation for water mass conservation. We therefore compare the water mass prior to a recharge event () with the water mass after recharge entered the system ( using the following equations:

We assume that crystals are nominally anhydrous and hence do not significantly contribute to water mass in the system, allowing us to neglect them here. To isolate the impacts of pressurization, magma mixing, and changes in phase proportions on alone, we assume closed system conditions where . We further define the pre-recharge chamber to be at lithostatic pressure (, while the post-recharge chamber is pressurized (, with the overpressure ( reached during the recharge event being significantly smaller than :

The solubility of water ( and gas density ( are each a function of pressure and therefore post-recharge water solubility and gas density can be expressed as follows:

If we substitute these expressions into and define , this gives the following equation to calculate water mass after the recharge event:

To calculate variations in the gas volume fractions ( between the initial ) and post-recharge (scenarios, we subtract the conservation for water mass equations from one another:

Extending this equation and solving for gives:

To now simulate recharge-induced pressurization (*Hypothesis 1*), we calculate variations in with pressure by varying between 5 and 25 MPa, while keeping the remaining variables constant. Following *hypothesis 2*, we calculate from changes in water solubilities () induced by magma mixing, while keeping the remaining variables constant. To obtain reliable estimates for , we first calculate water solubilities of the initial melts with variable initial H2O contents (3-5 wt%) using the exsolve_silicic function integrated in the magma chamber growth model. We then simulate mixing with a recharge magma containing 1 wt% H2O at 900 ºC and calculate water solubilities for the resulting post-recharge melts, yielding values between -0.002 and 0.0001. To ultimately quantify the influence of variations in melt and crystal phase proportions on (*Hypothesis 3*), we vary between 0.09 and 0.05, while keeping the remaining variables constant. These values correspond to a decrease in crystallinity of 10% to 50% in the host magma assuming an initial crystallinity of 10 vol%.

Symbols and constants used in here:

| **Symbol** | **Definition** | **Value or initial condition** | **Units** |
| --- | --- | --- | --- |
|  | Depth of the chamber | 6000 | m |
|  | Volume fractions of melt, crystals, and exsolved volatiles |  |  |
| , | Difference between crystal and gas volume fractions before and after recharge event |  |  |
|  | Gravitational acceleration | 9.81 | m/s2 |
| , | Mass of water before and after the recharge event |  | kg |
|  | Solubility of water in melt | parameterization of Liu et al., (2005) | wt% |
| , | Magma chamber pressure before and after the recharge event |  | Pa |
|  | Lithostatic pressure |  | Pa |
|  | Critical overpressure |  | Pa |
| , , | Density of melt, crystals, and exsolved volatiles |  | kg/m3 |
|  | Density of crust | 2700 | kg/m3 |
| , | Chamber volume before and after the recharge event |  | m3 |
